# Supplementary material for: A porous copper–organic framework with intersecting channels and gas adsorption properties
Source: Royal Society of Chemistry journal article supplement (doi:10.1039/c7dt03339g), 2017-01-01
Supplement: c7dt03339g1.pdf [file c7dt03339g1.pdf]

## Supporting Information

### **A porous copper-organic framework with intersecting channels and gas adsorption properties**

Zhen-Zhen Xue, Di Zhang, Jie Pan, Song-De Han, Jin-Hua Li and Guo-Ming Wang\*

*College of Chemistry and Chemical Engineering, Qingdao University, Shandong 266071, P. R. China.*

E-mail: [gmwang\\_pub@163.com](mailto:gmwang_pub@163.com); Tel: +86-532-85957339

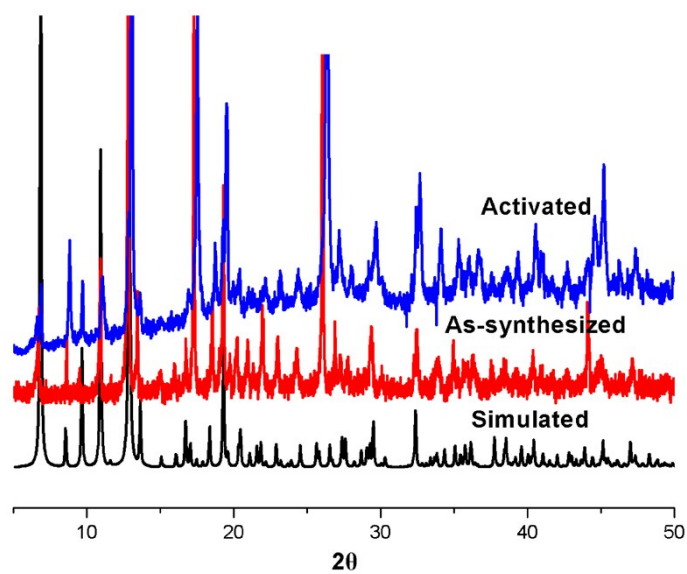

**Figure S1** PXRD patterns of simulated from the single-crystal data (black); as-synthesized (red); activated solid (blue).

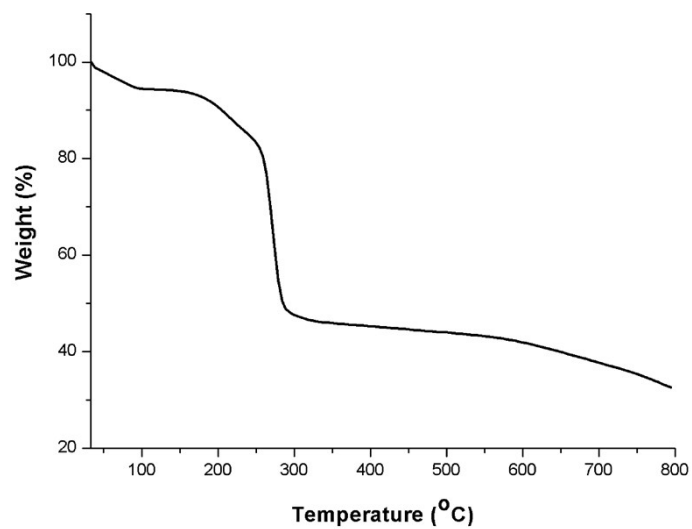

**Figure S2** TGA curve for the compound 1.

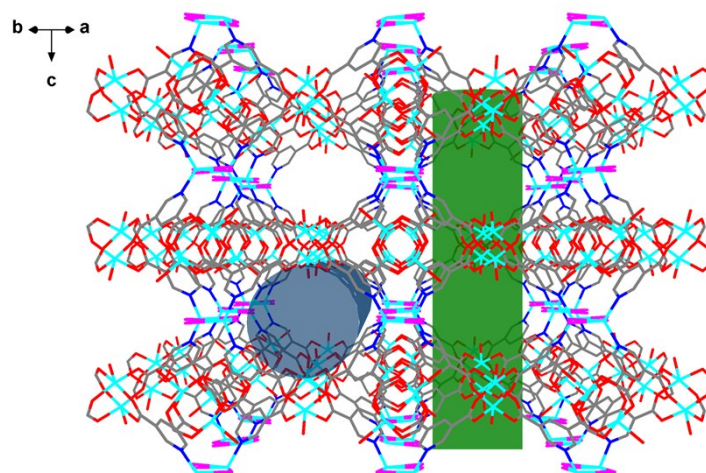

**Figure S3** The 3D framework viewed along the  $[1\ 1\ 0]$  orientation.

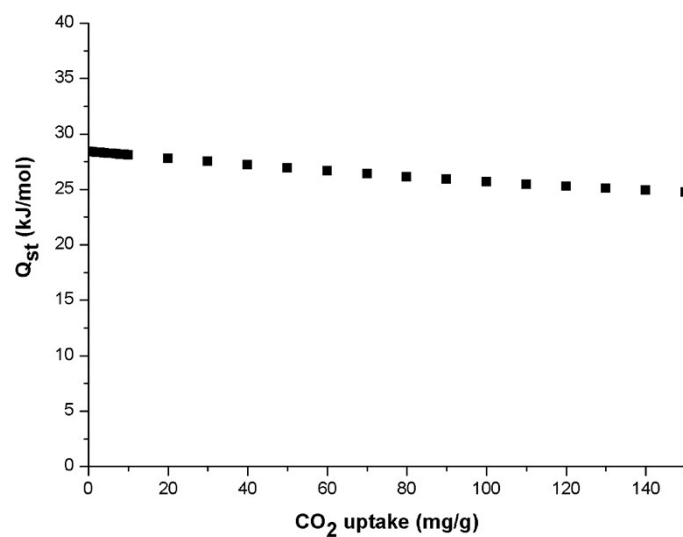

**Figure S4** The isosteric heat of adsorption for  $CO_2$  in compound **1**.

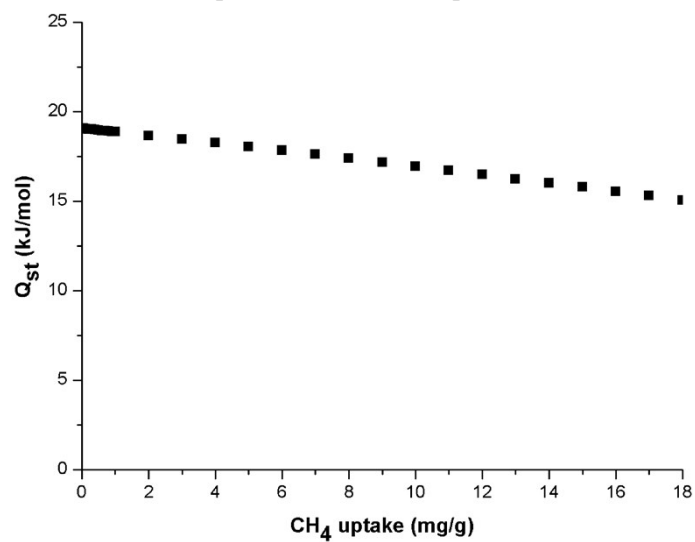

**Figure S5** The isosteric heat of adsorption for  $CH_4$  in compound **1**.
